# Supplementary material
Source: PubMed Central journal article supplement (PMC4106344)
Supplement: supp_M114.576249_jbc.M114.576249-1.pdf [file supp_M114.576249_jbc.M114.576249-1.pdf]

STPVVDDYKDDDDKAAATGYYP**FS**PF**FFLCTH**HGELEGDGEQGEVLI SLHIAGNPTYYPVPGQYEHVTI STSTFFDGD  
 LLVTGLYTSTSIQSSQSIGSSAFGFGIMSDHQFGNQ**CS**SVVASHVSHLPTTNLSFVWIAPPAGT**CV**NFMATATH  
 RGQVIFKDALAQQL**CE**QAPTEATAYSH**LAEI**HSDSVILRDDFDSYQQLNPNIWVE**CS**N**CE**MG**EQC**GTIMHGNAV  
**TFCE**PYGP**RE**LT**TTCL**N**TTT**ASV**LQ**FSIGSGS**CF**FSYSDPSITVSYAK**NT**ADW**IQ**LEK**IR**APSNVSTVIHILYLP**E**  
**EAK**GESV**Q**FQW**Q**DSL**RV**GEVY**EAC**WALDNILVINS**AH**REVVLEDNLD**PVD**TGNW**LFF**PGATV**KH**SC**Q**SDGNSIY**FH**  
 GNEGSEFN**FATTR**DV**DL**STEDI**QEQ**WSEEFES**QPT**GW**DIL**GAVV**GAD****CG**TVESGLSLV**FLK**DGER**FLCT**PYMD**TTG**Y  
 GN**LR**FYF**V**MG**GI**CD**PG**VSHENDI**I**LYAK**IE**GR**F**EH**IAL**DTLT**Y**SSYKVPSLVS**V**INPE**LQ**TPAT**K****FL**CR**Q**KSHQ**GY**  
 N**FN**VWAV**DF**FHVLPVLP**ST**MS**MI**Q**F**SIN**L**GC**G**TH**Q**PGNSV**S**LE**F**ST**NH**GRS**W**SL**LH**TE**CL**PE**I**CAG**PH**LPHSTV**S**  
 SENYSGWN**RIT**IPL**P**NAAL**TR**D**TR**IR**R**W**Q**TGP**I**LGN**M**W**AID**NVYIG**PS**CL**K****CS**GR**G**Q**CT**R**H**GC**K**CD**PG**FS**G**PAC**E**M  
 AS**Q**TF**PM**FISE**S**FGSAR**L**SSY**H**NFY**S**IRGA**E**V**S**FG**CG**V**L**AS**G**K**AL**V**FN**KD**G**RR**Q**L**I**TS**F**LD**SS**Q**S**R**F**L**Q**FT**L**R**L**GS**K**  
 SV**L**ST**CR**AP**D**Q**P**GE**G**V**L**L**H**YS**D**NG**I**T**W**KL**L**E**H**YS**V**NY**H**E**P**RI**I**S**V**E**L**P**D**DAR**Q**F**G**I**Q**F**R**W**W**Q**P**Y**H**SS**Q**GED**V**W**A**I  
 DE**I**V**M**TS**V**LF**N**S**I**SL**D**FT**N**L**V**EV**T**Q**S**L**G**F**Y**LGN**V**Q**P**Y**CG**H**D**W**T**L**CF**T**G**D**S**K**L**AS**S**M**R**Y**V**E**T**Q**S**M**Q**I**G**AS**Y**M**I**Q**F**SL**V**  
 M**CG**Q**K**Y**T**PH**M**D**N**Q**V**K**L**E**S**AN**H**GL**T**W**H**L**V**Q**EE****CL**PS**M**PS**Q**E**F**TS**S**I**Y**H**A**S**E**FT**Q**W**R**R**V**T**V**V**L**P**Q**K**T**W**S**G**A**T**R**F**R**  
 W**S**Q**S**Y**T**A**Q**DE**W**AL**D**N**I**Y**I**Q**GC****CP**N**M**CS**G**H**G**SC**D**H**G**V**CR**C**D**Q**G**Y**Q**G**T**E**CH**PE**A**AL**P**ST**I**MS**D**FN**P**SS**W**ES**D**W**Q**E**V**I  
 G**GE**V**V**K**PE**Q**CG**V**V**SS**G**SS**L**Y**F**SK**A**GR**Q**L**V**SW**D**L**D**T**S**W**V**DF**V**Q**F**Y**I**Q**IG**GES**A**A**C**N**K**P**D**S**F**E**E**G**I**LL**Q**YS**N**NG**G**I**Q**  
 W**H**LL**A**E**M**Y**F**S**D**FS**K**PR**F**V**Y**LE**L**P**A**A**A**K**T****CT**FR**R**W**W**Q**P**V**F**S**G**E**D**Y**D**Q**W**A**V**DD**I**I**L**SE**K**Q**K**Q**V**I**P**V**V**N**P**T**L**P**Q**N**F**Y**E**  
 K**P**A**E**D**Y**PM**N**Q**M**S**V**W**L**M**L**AN**E**G**MA**K**N**D**S**E**CA**TT**P**S**A**M**V**F**G**K**S**D**G**D**R**F**A**V**T****DL**T**L**K**P**G**Y**V**L**Q**F**K**L**N**I**G**T**S**Q**F**S**ST**A**P  
 V**LL**Q**Y**SH**D**A**G**M**S**W**L**V**K**E**C****CF**P**A**S**A**G**K**G**CE**GN**S**E**L**S**E**P**T**V**Y**Y**T**G**D**F**E**W**T**R**I**T**I**A**I**P**R**S**L**AS**S**K**TR**F**R**W**I**Q**E**SS**S**Q  
 K**N**V**P**PF**G**L**D**G**V**Y**I**S**E**P**CP**S**Y**CS**G**H**G**D**C**I**S**G**V****CF**CD**L**G**Y**T**A**A**Q**G**T**C**V**S**N**T**P**N**H**S**E**M**F**D**R**F**E**G**L**S**P**L**W**Y**K**I**T**G**G**Q**V**G**T**  
**GC**GT**L**ND**G**RS**L**Y**F**NG**L**G**K**R**E**ART**V**PL**D**TR**N**I**F**L**V**Q**F**Y**I**Q**I**G**S**K**T**SG**I**T**CI**K**P**RR**A**NE**G**L**V**V**Q**Y**S**ND**NG**I**L**W**H**LL**R**E**L**  
 D**F**M**S**E**L**E**P**Q**I**I**S**I**D**L**P**R**E**A**K****TP**A**T**A**F**R**W**W**Q**P**Q**H**G**K**H**S**A**Q**W**AL**D**D**V**L**I**G**V**ND**S**S**Q**T**G**F**Q**D**K**F**D**G**S**I**D**L**Q**AN**W**Y**R**I**Q**G**G**  
 Q**V**D**I**D**CL**S**M**D**T**AL**I**F**T**EN**I**G**K**PR**Y**A**E**T**W**DF**H**V**S**A**S**S**F**L**Q**F**E**M**N**M**GC**SK**P**F**S**GA**H**G**I**Q**L**Q**Y**SL**N**NG**K**D**W**Q**L**V**T**E**E****C**V**P**  
**P**T**I**G**CV**H**Y**T**E**S**S**T**Y**T**S**E**R****F**Q**N**W**R**R**V**T**V**Y**L**P**L**A**T**N**S**P**R****TR**F**R**W**I**Q**T**N**Y**T**V**G**A**D**S**W**A**I**D**N**V**I**L**A**S**G**CP**W**M**CS**G**R**G**I**C**D**S**  
**GR****CV****CD**R**G**F**G**G**PF****CV**P**V**V**L**P**S**I**L**K**D**D**F**NG**L**H**P**D**L**W**PE**V**Y**G**A**E**R**GN**L**GE**T**I**K**S**G**T**CL**I**F**K**GE**GL**R**M**L**I**S**R**D**L**D****CT**  
 N**T**M**Y**V**Q**F**S**L**R**F**I**A**K**G**T**P**E**R**S**H**S**I**L**L**Q**F**S**V**S**G**G**V**T**W**H**L**M**D**E**F**Y**F**P**Q**T**T**S**I**L**F**I**N**V**P**L**P**Y**G**A**Q**T**N**A**T**R**F**R**L**W**Q**P**Y**N**NG**K**  
 K**E**E**I**W**I**D**D**F**I**D**G**NN**L**N**P**V**L**L**D**T**F**D**F**G**P**RED**N**W**F**F**Y**P**G**G**N**I**G**L**Y****CP**Y**S**S**K**G**A**P**E**E**D**S**A**M**V**F**S**N**E**V**G**E**H**S**I**T**T**R  
 D**L**S**V**N**E**N**T**I**I**Q**F**E**I**N**V**G**CS**T**D**SS**S**A**D**P**V**R**L**E**F**S**R**D**F**G**A**T**W**H**L**L**L**P**L****CY**H**S**S**S**L**V**S**S**L**CS**T**E**H**H**PS**T**Y**Y**A**G**T**T**Q**G**W**R**  
 R**E**V**V**H**F**G**K**L**H**L**CG**S**V**R**FR**W**Y**Q**G**F**Y**P**A**G**S**Q**P**V**T**W**A**I**D**N**V**I**I**G**P**Q**CE**E**M****CY**G**H**G**S****C**I**NG**T**K****C**I**CD**P**G**Y**S**G**P**T**CK**I**S**T**K**N  
 P**D**F**L**K**D**D**F**E**G**Q**L**E**S**D**R**F**L**L**M**S**G**G**K**P**S**R**K****CG**I**L**S**S**G**N**L**F**F**N**E**D**G**L**R**M**L**V**T**F****DL**D**L**S**H**A**R**F**V**Q**F**M**R**L**CG**K**G**V**P**D**P**R  
 S**Q**P**V**L**L**Q**Y**SL**NG**GL**S**W**L**L**Q**E**F**L**S**N**S**S**N**V**GR****Y**I**A**E**M**PL**K**A**R**S**G**S**T**R**L****FW**Q**P**S**E**NG**H**F**Y**S**P**W**I**D**Q**I**L**I**G**GN**I**S**G**  
 N**T**V**L**E**D**D**F**ST**L**DS**R**K**W**L**L**H**P**G**G**T**K**M**P**V**CG**S**T**G**D**AL**V**F**I**E**K**A**S**T**R**Y**V**V**T**T**D**I**A**V**N**E**D**S**F**L**Q**I**D**F**A**A**S****CS**V**T**D**S****C**Y**A**I**E**  
 I**E**Y**S**V**D**L**G**L**S**W**H**PL**V**R**DL**PT**N**V**E****CS**R**Y**H**L**Q**R**I**L**V**S**D**T**FN**K**W**T**R**I**T**L**P**L**S**Y**T**R**S**Q**A**T**R**F**R**W**H**Q**P**A**P**F**D**K**Q**T**W**A**I**D**  
 N**V**Y**I**G**D**G**CL**D**M**CS**G**H**G**R**CV**Q**S****CV**C**D**E**Q**W**G**G**L**Y**C**D**E**P**E**T**S**L**P**T**Q**L**K**D**N**F**N**A**P**S**N**Q**N**W**L**T**V**S**G**G**L**S**T**V**CG**A**V**A**S**G**L**  
 A**L**H**F**S**G**G**CS**R**L**L**V**T**V**D**L**N**L**T**N**A**E**F**I**Q**F**Y**F**M**Y****GL**I**T**P**S**N**R**N**Q**G**V**L**L**E**Y**S**V**NG**G**I**T**W**N**L**L**M**E**I**F**Y**D**Q**Y**S**K**P**G**F**V**N**I**L**L**  
 P**P**D**A**K**E**I**A**T**R**F**R**W**W**Q**P**R**HD**G**L**D**Q**N**D**W**A**I**D**N**V**L**I**S**G**S**A**D**Q**R**T**V**M**L**D**T**F**S**S**A**P**V**P**Q**H**E**R**S**P**A**D**A**G**P**V**G**R**I**A**F**E**M**F**L**E**D**K**  
 T**S**V**N**E**N**W**L**F**H**D**D****CT**V**E**R**FC**D**S**P**D**G**V**M**L**CG**S**H**D**G**R**E**V**Y**A**V**T**H**D**L**T**P**T**E**N**W**I**M**Q**F**K**I**S**V**G****CK**V**P**E**K**I**A**Q**N**Q**I**H**V**Q**F**ST**D**  
 F**G**V**S**W**S**Y**L**V**P**Q**CL**P**A**D**P**K**CS**G**S**V**S**Q**P**S**V**F**F**P**T**E**G**W**K****R**I**T**Y**P**L**P**E**S**L**T**G**N**P**V**R**FR**F**Y**Q**K**Y**S**D**V**Q**W**A**I**D**N**F**Y**L**G**P**G****CL**D  
 N**CG**G**H**G**D****CL**K**E**Q**C**I**CD**P**G**Y**S**G**P**N**C**Y**L**T**H**S**L**K**T**F**L**K**E**R**FD**S**E**E**I**K**P**D**L**W**M**S**L**E**G**G**S**T**CTE****CG**V**L**A**E**N**T**A**L**Y**F**G**G**S**T**V**R**  
 Q**A**I**T**Q**D**L**D**L**R**G**A**K**F**L**Q**Y**W**G**R**I**G**S**E**N**N**M**T**S**CHR**P**V****CR**K**E**G**V**L**L**D**F**ST**D**G**G**I**T**W**T**L**L**H**E**M**D**F**Q**K**Y**I**S**V**R**H**D**Y**I**L**L**P**E**G**A**  
 L**T**N**T**T**R**L**R**W**W**Q**P**F**V**I**S**N**L**V**S**G**V**E**R**A**Q**W**A**L**D**N**I**L**I**G**G**A**E**I**N**P**S**Q**L**V**D**T**F**D**D**E**G**S**S**H**E**E**N**W**S**F**Y**P**N**A**V**R**T**A**G**F**CG**N**P**  
 S**F**H**L**Y**W**P**N**K**K**D**K**T**H**N**A**L**S**S**F**E**L**I**I**Q**P**G**Y**M**M**Q**F**K**I**V**V**G**CE**A**T**S**CG**D**L**H**S**V**M**L**E**Y**T**K**D**A**R**S**D**S**W**Q**L**V**Q**T**Q**CL**P**S**S**S**N**S  
 I**G****CS**P**F**Q**F**H**E**A**T**I**Y**N**A**V**N**S**S**S**W**K**R**I**T**I**Q**L**P**D**H**V**S**S**A**T**Q**F**R**W**I**Q**K**G**E**E**T**E**K**Q**S**W**A**I**D**H**V**Y**I**G**E**A**CP**K**L**CS**G**H**G**Y**CT**T  
 G**A**V**CI**C**D**E**S**F**Q**G**D**D**CS**V**F**S**H**E**L**P**S**Y**I**K**D**N**F**E**S**A**R**V**T**E**A**N**W**E**T**I**Q**G**G**V**I**G**S**G**CG**Q**L**A**P**Y**A**H**G**D**S**L**Y**F**NG****CQ**I**R**Q**A**A**T**K  
 P**L**D**L**T**R**A**S**K**I**M**F**V**L**Q**I**G**S**P**A**Q**T**D**S****C**N**S**D**L**S**G**P**H**T**V**D**K**A**V**L**L**Q**Y**S**V**N**NG**I**T**W**H**V**I**A**Q**H**Q**P**K**D**F**T**Q**A**Q**R**V**S**Y**N**V**P**L**E**A**R  
 M**K**G**V**L**L**R**W**W**Q**P**R**H**NG**T**G**H**D**Q**W**A**L**D**H**V**E**V**L**V**S**T**R**K**Q**N**Y**M**M**N**F**S**R**Q**H**G**L**R**H**F**Y**N**R**R**R**R**S**L**R**R**Y**P**L**E**V**L**F**Q

**Figure S1.** Reelin sequence coverage from MS/MS analysis. Reelin amino acid sequence with identified peptide sequences indicated in black and cysteins in red. The Reelin sequence shown corresponds to uniprot IPI00121421.1 (Uniprot Q60841) with a 56.8% sequence coverage.
